# Supplementary material for: Stents versus bypass surgery: 3-year mortality risk of patients with coronary interventions aged 50+ in Germany
Source: Springer Nature journal article supplement (doi:10.1186/s13019-022-02014-2), 2022-10-01

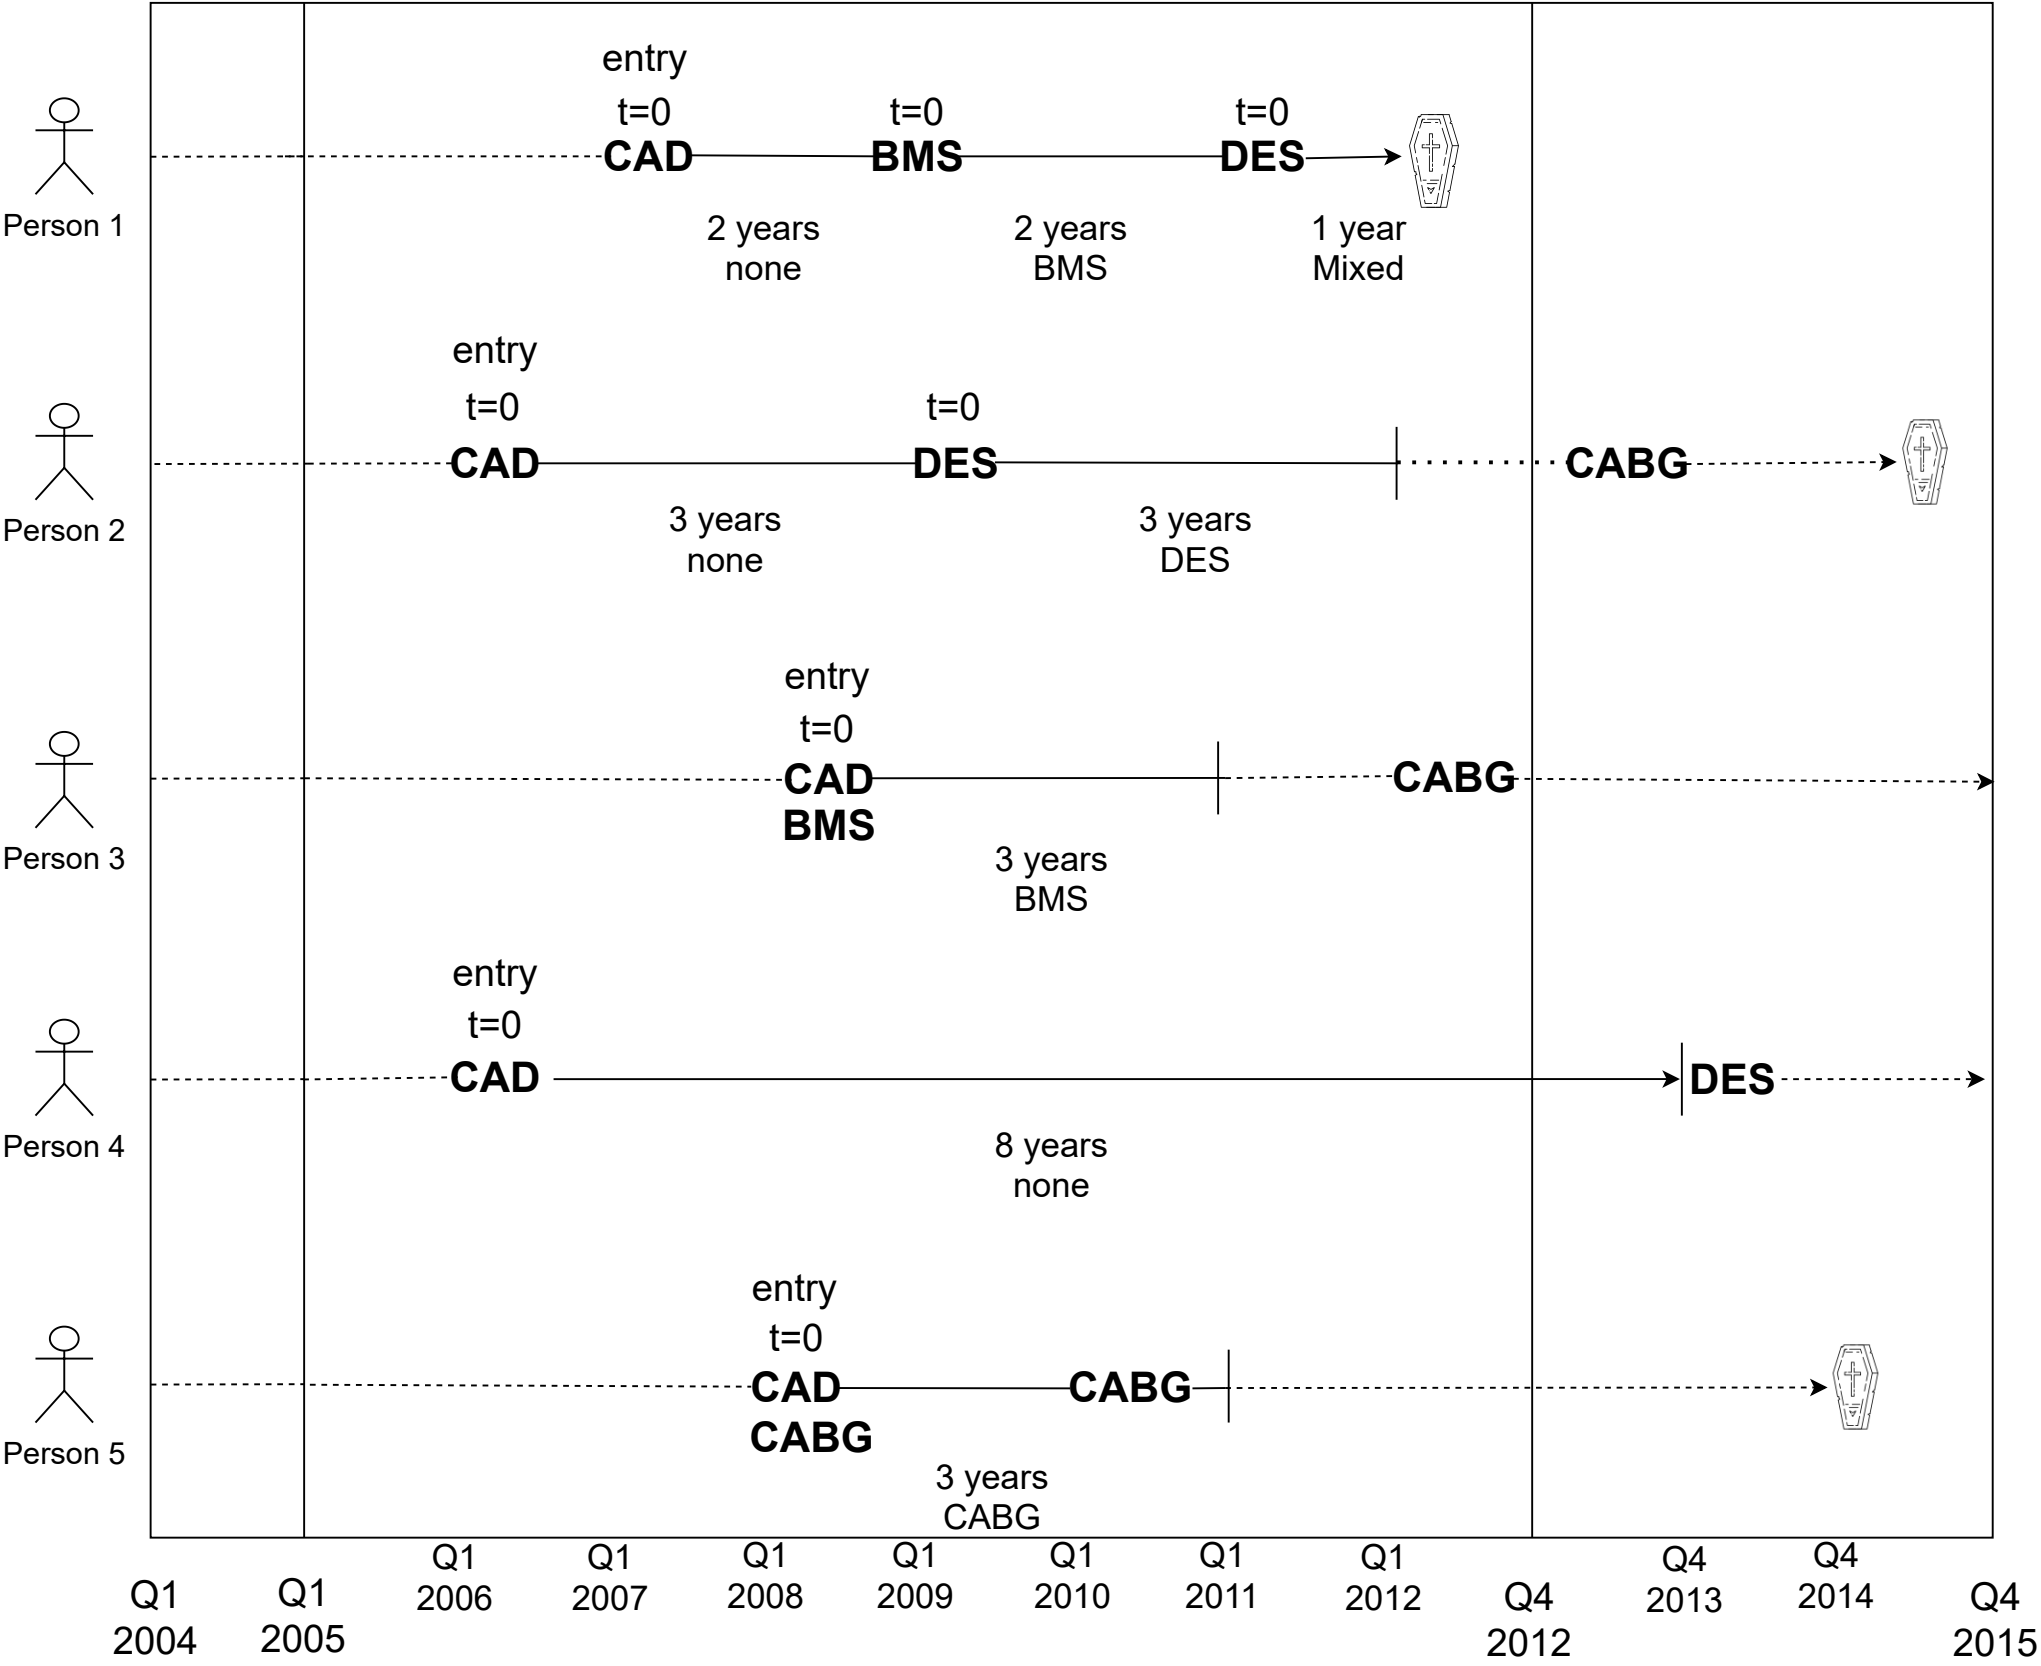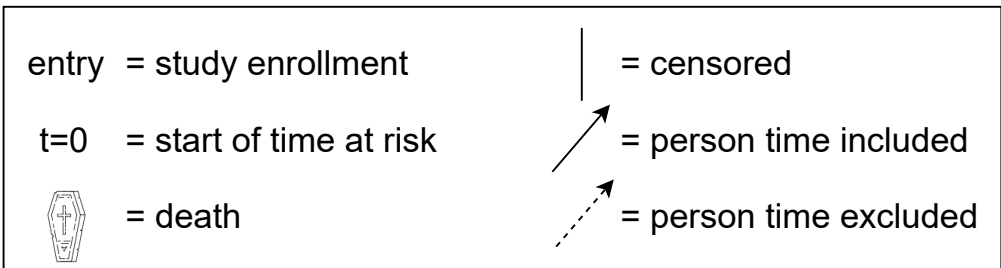

Supplement: MOESM1 [file 23561774]
