# Supplementary material for: Stents versus bypass surgery: 3-year mortality risk of patients with coronary interventions aged 50+ in Germany
Source: Springer Nature journal article supplement (doi:10.1186/s13019-022-02014-2), 2022-10-01

Figure 4. Age-specific and age-standardized 3-year mortality rates of CAD-patients by sex and coronary interventions from 2005 to 2015: BMS (A), DES (B), CABG (C), mixed (D) or none (E)

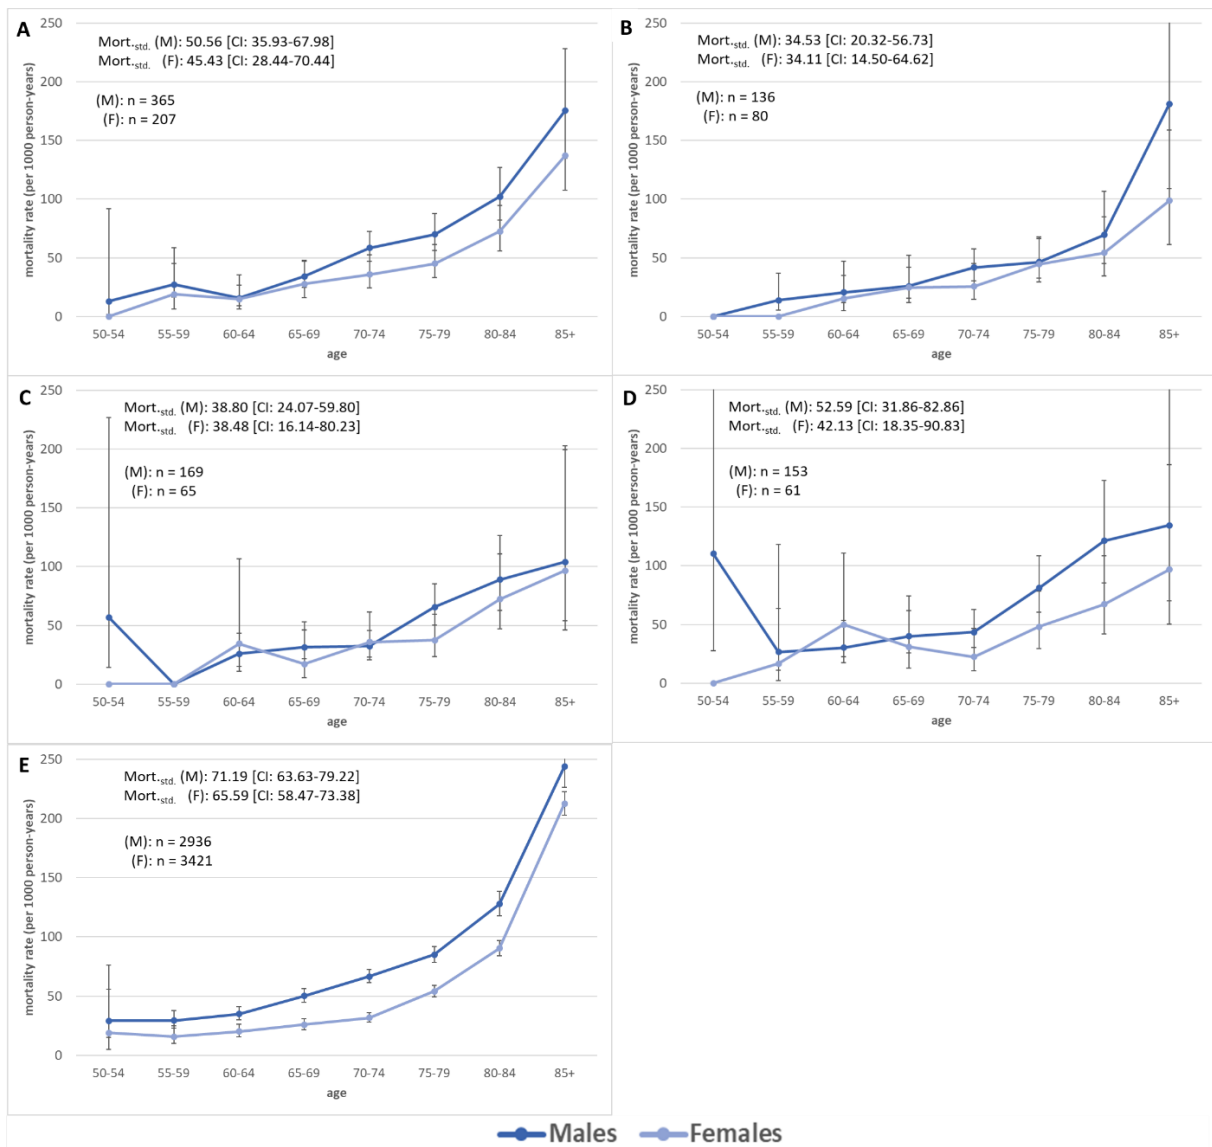

Supplement: MOESM3 [file 23561774]
